# Supplementary material
Source: HighWire-hosted journal article supplement (https://www.cmajopen.ca/highwire/filestream/84945/field_highwire_adjunct_files/2/CMAJOpen-2020-0139-1-at.pdf)
Supplement: CMAJOpen-2020-0139-1-at.pdf [file CMAJOpen-2020-0139-1-at.pdf]

**Supplementary Table 1.** Observed invasive cervical cancer cases by self-identified ethnicity/race and language most often spoken at home compared to expected cases relative to the BC females general population by time period.

| Category                             | Most recent (2009-2013) |                    |                          |     |      | Early (2004-2008) |       |                    |                          |     |      |      |
|--------------------------------------|-------------------------|--------------------|--------------------------|-----|------|-------------------|-------|--------------------|--------------------------|-----|------|------|
|                                      | O                       | ICC Proportion (%) | Census ASP (Weighted; %) | E   | SR   | P                 | O     | ICC Proportion (%) | Census ASP (Weighted; %) | E   | SR   | P    |
| <b>Ethnicity/ Race</b>               |                         |                    |                          |     |      |                   |       |                    |                          |     |      |      |
| <b>Overall</b>                       | N=587                   |                    |                          |     |      | ***               | N=530 |                    |                          |     |      | *    |
| Not a visible minority               | 404                     | 68.8               | 76.0                     | 446 | 0.91 |                   | 393   | 74.1               | 78.7                     | 417 | 0.94 |      |
| Visible Minority                     | 183                     | 31.2               | 24.0                     | 141 | 1.30 |                   | 137   | 25.8               | 21.3                     | 113 | 1.21 |      |
| <b>Within not a visible minority</b> | N=404                   |                    |                          |     |      | ***               | N=393 |                    |                          |     |      | ***  |
| Caucasian/White                      | 355                     | 87.9               | 94.6                     | 383 | 0.93 |                   | 357   | 90.8               | 95.4                     | 375 | 0.95 |      |
| Indigenous                           | 49                      | 12.1               | 5.1                      | 21  | 2.34 |                   | 36    | 9.2                | 4.6                      | 18  | 1.97 |      |
| <b>Within visible minority</b>       | N=183                   |                    |                          |     |      | ***               | N=137 |                    |                          |     |      | 0.08 |
| Chinese                              | 69                      | 37.7               | 26.4                     | 48  | 1.43 |                   | 49    | 35.8               | 47.4                     | 65  | 0.75 |      |
| South Asian                          | 40                      | 21.9               | 42.5                     | 78  | 0.51 |                   | 32    | 23.4               | 27.0                     | 37  | 0.86 |      |
| Filipino                             | 19                      | 10.4               | 8.5                      | 16  | 1.22 |                   | 19    | 13.9               | 6.1                      | 8   | 2.26 |      |
| Korean                               | 13                      | 7.1                | 4.1                      | 7   | 1.75 |                   | 8     | 5.8                | 3.3                      | 5   | 1.79 |      |
| Japanese                             | 10                      | 5.5                | 2.9                      | 5   | 1.88 |                   | 7     | 5.1                | 3.2                      | 4   | 1.59 |      |
| All other <sup>a</sup>               | 32                      | 17.5               | 15.7                     | 29  | 1.12 |                   | 22    | 16.1               | 13.0                     | 18  | 1.24 |      |
| <b>Language</b>                      |                         |                    |                          |     |      |                   |       |                    |                          |     |      |      |
| <b>Overall</b>                       | N=522                   |                    |                          |     |      | 0.92              | N=559 |                    |                          |     |      | 0.16 |
| Official Languages                   | 426                     | 81.6               | 81.5                     | 425 | 1.00 |                   | 475   | 85.0               | 82.7                     | 463 | 1.03 |      |
| Non-Official Languages               | 96                      | 18.4               | 18.5                     | 97  | 0.99 |                   | 84    | 15.0               | 17.3                     | 96  | 0.87 |      |
| <b>Within non-Official Languages</b> | N=96                    |                    |                          |     |      | 0.01              | N=84  |                    |                          |     |      | 0.05 |
| Chinese Languages                    | 43                      | 44.8               | 40.8                     | 39  | 1.10 |                   | 37    | 44.0               | 42.7                     | 36  | 1.03 |      |
| Punjabi                              | 22                      | 22.9               | 18.8                     | 18  | 1.22 |                   | 23    | 27.4               | 18.0                     | 15  | 1.52 |      |
| Other Indo-Iranian Languages         | 10                      | 10.4               | 7.3                      | 7   | 1.42 |                   | 6     | 7.1                | 6.2                      | 5   | 1.15 |      |
| All Other Languages                  | 21                      | 21.9               | 33.1                     | 32  | 0.66 |                   | 18    | 21.4               | 33.1                     | 28  | 0.65 |      |

O = Observed; ICC = Invasive cervical cancer; ASP = Age-standardized proportion; E = Expected; SR = Standardized Ratio; P = P value;

The standardized ratio was derived by dividing the observed and age-adjusted expected counts.

<sup>a</sup> The population group “All other” includes various population groups that individually had less than five counts.

\*\*\* =  $p < 0.0001$ , \*\* =  $p < 0.001$ , \* =  $p < 0.05$

Ethnicity unknown: Most recent period (2009-2013): N= 51, 8.0%; Early period (2004-2008): N=47, 8.1%

Fisher’s exact test was used for ‘Within visible minority’ comparisons due to expected cell sizes being less than 5.

Language unknown: Most recent period (2009-2013): N = 116, 18%; Early period (2004-2008): N 18 = 3.0%

**Supplementary Table 2.** Observed ICC cases by smoking status, marital status and CHSA urban-rural classification compared to expected cases relative to the BC females general population by time period.

| Category                         | Late (2009-2013) |                    |                          |     |      |      | Early (2004-2008) |                    |                          |     |      |     |
|----------------------------------|------------------|--------------------|--------------------------|-----|------|------|-------------------|--------------------|--------------------------|-----|------|-----|
|                                  | O                | ICC Proportion (%) | Census ASP (Weighted; %) | E   | SR   | P    | O                 | ICC Proportion (%) | Census ASP (Weighted; %) | E   | SR   | P   |
| <b>Smoking Status</b>            | N=623            |                    |                          |     |      | 0.08 | N=568             |                    |                          |     |      | *** |
| Current Smoker                   | 109              | 17.5               | 14.4                     | 90  | 1.22 |      | 120               | 21.1               | 14.4                     | 82  | 1.46 |     |
| Former Smoker                    | 234              | 37.6               | 39.1                     | 244 | 0.96 |      | 195               | 34.3               | 38.8                     | 220 | 0.89 |     |
| Never Smoker                     | 280              | 44.9               | 46.5                     | 290 | 0.97 |      | 253               | 44.5               | 46.8                     | 266 | 0.95 |     |
| <b>Marital Status</b>            | N=633            |                    |                          |     |      | ***  | N=570             |                    |                          |     |      | *   |
| Married                          | 382              | 60.3               | 67.4                     | 427 | 0.90 |      | 343               | 60.2               | 66.9                     | 381 | 0.90 |     |
| Widowed or separated or divorced | 150              | 23.7               | 19.4                     | 123 | 1.22 |      | 139               | 24.4               | 19.6                     | 112 | 1.24 |     |
| Single                           | 101              | 16.0               | 13.2                     | 83  | 1.21 |      | 88                | 15.4               | 13.5                     | 77  | 1.15 |     |
| <b>CHSA Classifications</b>      | 901              |                    |                          |     |      | ***  |                   |                    |                          |     |      | *** |
| Metro                            | 419              | 46.5               | 51.0                     | 460 | 0.91 |      | 347               | 44.4               | 49.9                     | 391 | 0.89 |     |
| Large Urban                      | 135              | 15.0               | 14.0                     | 135 | 1.00 |      | 109               | 13.9               | 14.3                     | 120 | 0.91 |     |
| Medium Urban                     | 132              | 14.7               | 16.4                     | 148 | 0.89 |      | 108               | 13.8               | 16.6                     | 130 | 0.83 |     |
| Small Urban                      | 66               | 7.3                | 8.9                      | 80  | 0.83 |      | 64                | 8.2                | 9.0                      | 71  | 0.91 |     |
| Rural-Hub                        | 43               | 4.8                | 3.9                      | 35  | 1.22 |      | 44                | 5.6                | 4.1                      | 32  | 1.37 |     |
| Rural/Remote                     | 106              | 11.8               | 4.8                      | 43  | 2.48 |      | 110               | 14.1               | 5.0                      | 39  | 2.79 |     |

The standardized ratio was derived by dividing the observed and age-adjusted expected counts.

ICC = Invasive Cervical Cancer

\*\*\* =  $p < 0.0001$ , \*\* =  $p < 0.001$ , \* =  $p < 0.05$

Unknown smoking: Most recent period (2009-2013): N=15, 2.3%; Early period (2004-2008): N = 9, 1.5%

Unknown married: Most recent period (2009-2013): N=5, 0.8%; Early period (2004-2008): N=7, 1.2%
